# Supplementary material
Source: publisher figshare collection journal article supplement (https://frontiersin.figshare.com/ndownloader/files/16776815)
Supplement: Supplementary file 1 [file 16776815]

## Sheet: Sheet1
Chemical analyses of samples collected by remotely operated vehicle Doc Ricketts dive DR767 in the San Clemente Fault at 32.0433°N 117.4632° and in dive DR769 in the San Diego Trough Fault at 32.491786°N 117.473113°W
Analyte Symbol	Unit Symbol	Detection Limit	Analysis Method	DR767 Rx-1	DR767 Rx-2	DR767 Rx-3	DR767 Rx-4	DR769 Rx-1	DR769 Rx-2		SRM measured, ppm	SRM certified, ppm	SRM	SRM measured, ppm	SRM certified, ppm	SRM	SRM measured, ppm	SRM certified, ppm	SRM	Difference, measured vs certified, %
Au	ppb	2	INAA	< 2	< 2	< 2	< 2	< 2	< 2
Ag	ppm	0.5	FUS-MS	< 0.5	< 0.5	< 0.5	< 0.5	< 0.5	< 0.5		2.8	2.7	LKSD-3	1	0.046	W-2a				3.7037
As	ppm	0.5	INAA	< 0.5	< 0.5	< 0.5	< 0.5	< 0.5	< 0.5
B	ppm	10	FUS-MS-Na2O2	10	20	< 10	20	20	< 10		10	4.5	GXR-4							122.222
Ba	%	0.001	FUS-ICP	53.7	55.7	55.7	4.25	54.8	54.5		1760	1640	GXR-4							7.31707
Be	ppm	1	FUS-ICP	< 1	< 1	< 1	< 1	< 1	< 1		< 1	0.58	BIR 1a	3	2.6	SY-4	4	4	GBW 07113
Bi	ppm	0.1	FUS-MS	< 0.1	< 0.1	< 0.1	< 0.1	< 0.1	< 0.1		< 0.1	0.03	W-2a	0.5	0.56	JR-1
Br	ppm	0.5	INAA	16.4	17.4	4.6	9.9	9.7	8.3
Cd	ppm	2	FUS-MS-Na2O2	< 2	< 2	< 2	< 2	< 2	< 2		<2	0.86	GXR-4
Ce	ppm	0.05	FUS-MS	2.31	0.67	0.34	8.18	1.4	0.73		1.8	1.9	BIR-1a	24.6	23	W2-a				-5.26316
Co	ppm	0.2	FUS-MS-Na2O2	1.1	0.2	0.2	2.8	0.7	0.3		15.1	14.6	GXR-4							3.42466
Cr	ppm	30	FUS-MS-Na2O2	30	< 30	< 30	40	< 30	< 30		80	64	GXR-4							25
Cs	ppm	0.1	FUS-MS-Na2O2	0.2	0.2	< 0.1	1.3	0.2	0.1		2.8	2.8	GXR-4							0
Cu	ppm	2	FUS-MS-Na2O2	24	16	15	19	13	22		431	434	OREAS 101a							-0.691244
Dy	ppm	0.01	FUS-MS	0.2	0.08	< 0.01	0.87	0.16	0.05		3.9	3.6	W-2a							8.33333
Er	ppm	0.01	FUS-MS	0.13	0.04	0.03	0.49	0.11	0.06		3.92	3.61	JR-1							8.58726
Ga	ppm	0.2	FUS-MS-Na2O2	1.1	0.6	0.5	3.9	0.8	0.5		21.6	20	GXR-4							8
Gd	ppm	0.01	FUS-MS	0.64	0.4	0.53	0.84	0.47	0.44		2.2	2	BIR-1a							10
Ge	ppm	0.5	FUS-MS	< 0.5	< 0.5	< 0.5	< 0.5	< 0.5	< 0.5		1.5	1	W2-a							50
Hf	ppm	0.1	FUS-MS	0.4	0.2	0.3	0.8	0.3	0.3		1.3	1.13	CTA-AC-1	2.4	2.6	W2-a				15.0442
Ho	ppm	0.01	FUS-MS	0.03	0.01	< 0.01	0.17	0.03	0.02		0.78	0.76	W2-a							2.63158
In	ppm	0.2	FUS-MS-Na2O2	< 0.2	< 0.2	< 0.2	< 0.2	< 0.2	< 0.2		0.2	0.27	GXR-4							-25.9259
Ir	ppb	5	INAA	< 5	< 5	< 5	< 5	< 5	< 5
La	ppm	0.05	FUS-MS	4.75	2.42	4.32	4.85	3.38	3.35		0.7	0.63	BIR-1a	3.8	3.6	DNC-1	10.4	10	W2-a	11.1111
Li	ppm	3	FUS-MS-Na2O2	< 3	< 3	< 3	9	< 3	< 3		12	11.1	GXR-4							8.10811
Lu	ppm	0.002	FUS-MS	0.025	0.005	0.007	0.066	0.014	0.011		0.4	0.4	LKSD-3	0.31	0.33	W2-a	0.67	0.71	JR-1	0
Mo	ppm	1	FUS-MS-Na2O2	8	7	7	9	4	6		25	21.9	OREAS 101a							14.1553
Nb	ppm	0.2	FUS-MS	3.2	2.1	< 0.2	3	< 0.2	< 0.2		8.4	7.9	W2-a							6.32911
Nd	ppm	0.05	FUS-MS	0.98	0.3	0.11	4.43	0.54	0.25		2.4	2.5	BIR-1a							-4
Ni	ppm	10	FUS-MS-Na2O2	10	10	10	30	10	10		>10000	474400	PTM-1a
Pb	ppm	0.8	FUS-MS-Na2O2	5.6	2.8	26.2	5.2	1.8	6.6		54.6	52	GXR-4							5
Pr	ppm	0.01	FUS-MS	0.26	0.09	0.04	1.04	0.15	0.08		5.7	5.58	JR-1							2.15054
Rb	ppm	0.4	FUS-MS-Na2O2	3.8	1.6	0.7	21.3	3	1.5		169	160	GXR-4							5.625
Sb	ppm	0.1	INAA	< 0.1	< 0.1	< 0.1	0.5	< 0.1	0.1		7.6	7.9	DMMAS 119							-3.79747
Sc	ppm	1	FUS-ICP	< 1	< 1	< 1	4	< 1	< 1		1	1.1	SY-4	5	5	GBW 07113	31	31	DNC-1	-9.09091
Se	ppm	0.8	FUS-MS-Na2O2	< 0.8	< 0.8	< 0.8	< 0.8	< 0.8	< 0.8
Sn	ppm	0.5	FUS-MS-Na2O2	< 0.5	< 0.5	< 0.5	< 0.5	< 0.5	< 0.5
Sr	ppm	2	FUS-ICP	15440	12450	11000	1516	12080	16560		1206	1191	SY-4							1.25945
Ta	ppm	0.01	FUS-MS	0.69	0.66	0.44	0.48	0.38	0.42		1.95	1.86	JR-1							4.83871
Tb	ppm	0.01	FUS-MS	0.07	0.03	0.06	0.15	0.06	0.06		0.63	0.63	W2-a	3.43	3.8	OREAS 100a				0
Te	ppm	6	FUS-MS-Na2O2	< 6	< 6	< 6	< 6	< 6	< 6		<6	0.97	GXR-4
Th	ppm	0.05	FUS-MS	0.29	0.08	< 0.05	1.52	0.24	0.12		2.3	2.4	W-2a							-4.16667
Tl	ppm	0.05	FUS-MS	< 0.05	< 0.05	< 0.05	< 0.05	< 0.05	< 0.05		0.11	0.2	W-2a							-45
Tm	ppm	0.005	FUS-MS	< 0.005	< 0.005	< 0.005	0.073	< 0.005	< 0.005		2.1	2.2	NCS DC70009 (GBW07241)	2.26	2.31	OREAS 100a	2.68	2.66	OREAS 101b	-4.54545
U	ppm	0.01	FUS-MS	0.39	0.53	0.25	7	0.47	1.08		0.49	0.53	W-2a	4.5	4.6	LKSD-3	8.8	8.88	JR-1	-7.54717
V	ppm	5	FUS-ICP	6	7	< 5	45	7	< 5		6	5	GBW 07113	10	8	SY-4				20
W	ppm	0.5	FUS-MS	4.6	6.8	1.9	6.3	2.4	2		0.8	0.3	W-2a	2040	2200	NCS DC70009 (GBW07241)				166.667
Y	ppm	0.1	FUS-MS-Na2O2	2	1.5	0.8	6.3	1.5	1.1		14.6	14	GXR-4							4.28571
Yb	ppm	0.01	FUS-MS	0.17	< 0.01	0.04	0.47	0.07	0.07		1.3	1.6	GXR-4							-18.75
Zn	ppm	30	FUS-MS-Na2O2	30	30	30	40	30	< 30		90	73	GXR-4							23.2877
Zr	ppm	1	FUS-ICP	11	5	2	51	8	4		17	18	BIR-1a							-5.55556
Methods:	FUS-MS: Lithium metaborate/tetraborate fusion followed by analisys on a Perkin Elmer-ELAN 9000 ICP-MS										Standard reference materials (SRM):
	FUS-ICP: Lithium metaborate/tetraborate fusion followed by analisys on a Agilent 700 ICP-OES										OREAS 100a, OREAS 101a, OREAS 101b: Ore Research & Exploration Standard reference material, Australia
	FUS-MS-Na2O2: Hot sodium peroxide fusion followed by analisys on a Perkin Elmer-ELAN 9000 ICP-MS										GXR-4: USGS geochemical exploration reference material
	INAA: Neutron Activation Analysis										BIR-1a, W2-a, DNC-1a: USGS mafic reference material
Sm and Eu not reported due to Ba interference											GBW 07113, NCS DC70009 (GBW07241): Fluxana certified reference materials, Germany
											LKSD-3, SY-4, PTM-1a: Natural Resources Canada certified reference material
											JR-1: Geological Survey of Japan, geochemical reference sample
											CTA-AC-1: Institute of Nuclear chemistry and Technology (INCT/ICHTJ), Poland, certified reference material
